# Supplementary material for: Targeted deletion of ERK2 in cardiomyocytes attenuates hypertrophic response but provokes pathological stress induced cardiac dysfunction
Source: PubMed Central journal article supplement — J Mol Cell Cardiol. 2014 Jul;72(100):104–16. doi: 10.1016/j.yjmcc.2014.03.002 (PMC4046245; doi:10.1016/j.yjmcc.2014.03.002), 2014-07

## Supplemental Data

### Materials and Methods

#### Generation of ERK2 cardiomyocyte-specific knockout mice

To exclusively study ERK2 signaling in hypertrophic remodeling the Cre-loxP system was used to generate a cardiomyocyte-specific ERK2 knockout mouse model. For development of a conditional knockout mouse, two different mouse lines were generated. The first line contained a transgene that led to a cardiomyocyte-specific expression of Cre under the myosin light chain (MLC2v) promoter (kindly provided by Dr KR Chien, Massachusetts General Hospital, USA). The MLC2v-Cre mouse line sustains efficient ventricular-specific Cre activity and is indistinguishable from wild-type mice in cardiac morphology and stress response [1]. The second mouse line ERK2-flox mice (referred to as ERK2<sup>f/f</sup>) carried two loxP sites flanking exons 2 and 3 of ERK2 gene (kindly provided by Dr S Endo, Institute of Science and Technology, Okinawa, Japan). The two loxP sites were inserted in introns or non-transcription regions. Both mouse models were generated by homologous recombination in embryonic cells.

#### Transverse aortic constriction (TAC)

The 8-10 weeks old mice were anesthetized with a mixture of ketamine (100mg/kg) and xylazine (5mg/kg) by intraperitoneal injection and endotracheal intubated. TAC was performed as previously described [2]. Briefly, the transverse aorta was isolated and constricted by a 7-0 nylon suture ligature, tied to yield a constriction. Sham mice were used as reference control and underwent the same surgery in which the aorta was only visualized but not constricted. After surgery, buprenorphine (0.1mg/kg) and saline (0.1ml/10g) were intraperitoneally injected and mice were allowed to recover. After 1 or 5 weeks of treatment the mice were further analyzed.

#### Osmotic pump infusion of Isoproterenol

To achieve  $\beta$ -adrenergic-induced hypertrophy 8 to 10 weeks old male mice were anesthetized with 1.5% isoflurane and ALZET minipumps (model 2001) were inserted subcutaneously to deliver Isoproterenol (ISO, Sigma-Aldrich) at 10mg/kg/day or vehicle (Water for Injection, Braun). Following 1 week of treatment, mice were further analyzed.

#### Swimming exercise

Physiological cardiac hypertrophy was induced by swimming exercise. Eight-week old male ERK2<sup>f/f</sup> and ERK2<sup>cko</sup> mice swam twice a day for up to 90 minutes in pre-warmed water, maintained at 34°C. The mice were supervised throughout the exercise to ensure their safety. After a total of 4 weeks of swimming, the cardiac function was determined by echocardiography and mice were sacrificed for further analysis. Sedentary, 8 week old mice of both genotypes were confined to cages for 4 weeks without following the swimming protocol and served as a reference control (rest).

#### Echocardiography

Mice were anesthetized with Avertin (240mg/kg). The cardiac function was evaluated by echocardiography using an Acuson Sequoia C256 ultrasound machine. For each mouse, measurements of the left ventricle end-systolic (LVESD) and left ventricle end-diastolic (LVEDD) dimensions, intraventricular septum thickness (dIVS) and left ventricular posterior wall thickness (dPW) were obtained. From these parameters LV fraction shortening (FS) was calculated using the following formula:  $FS = \frac{LVEDD - LVESD}{LVEDD} \cdot 100$  [3].

#### Histological analysis and TUNEL assay

Freshly dissected heart tissue was fixed in 4% paraformaldehyde, dehydrated and embedded in paraffin. 5 $\mu$ m thick sections were cut and stained with Haematoxylin/eosin staining to measure cross sectional area, and stained using the Masson's trichrome method for examining fibrosis formation as previously described [4]. The mean cross-sectional areas of 200 randomly selected cardiomyocytes were measured by ImageJ software. To calculate the mean interstitial fibrosis 45 randomly chosen frames of each experimental group were assessed using ImageJ software.

TUNEL was performed to detect apoptosis on 5 $\mu$ m thick paraffin embedded heart tissue sections using *in situ* Cell Death Detection Kit (Roche Applied Science). Triple staining with TUNEL, DAPI (1:1000) and anti- $\alpha$ -actinin antibody (1:20, Sigma, A7811) was performed to identify apoptosis exclusively in cardiomyocytes.

#### Preparation of lysates and immunoblotting

Tissue samples were homogenised in triton lysis buffer (20mM Tris pH 7.4, 137mM NaCl, 2mM EDTA pH 7.4, 1% Triton X-100, 25mM b-glycerophosphate, 1mM Na<sub>3</sub>VO<sub>4</sub>, 1mM phenylmethanesulphonylfluoride (PMSF), 1.54µM Aprotinin, 21.6µM Leupeptin, 10% Glycerol). The protein concentration was determined by Bradford assay (Bio-Rad). Protein extracts (30µg) were subjected to Western blot analyses with antibodies against ERK1 (Santa Cruz), ERK2 (Santa Cruz), ERK5 (Upstate), Phospho-ERK5 (Invitrogen), p38 (Santa Cruz), Phospho-ERK1/2, MEK1/2, Phospho-MEK1/2, Phospho-p38, JNK1/2, Phospho-JNK1/2, PKB, Phospho-PKB, active caspase 3 (Cell signaling) or  $\alpha$ -Tubulin (Sigma-Aldrich). Immunocomplexes were detected by enhanced chemiluminescence with anti-mouse, anti-rabbit or anti-goat immunoglobulin G-coupled to horseradish peroxidase as the secondary antibody (Amersham-Pharmacia).

#### **ERK1/2 kinase assay**

Tissue samples were homogenised in triton lysis buffer. Protein extracts were applied for ERK1/2 kinase assay following the manufacturer's instruction (Cell signaling).

#### **siRNA transfection of neonatal rat cardiomyocytes (NRCMs)**

Primary cultures of neonatal rat cardiomyocytes (NRCMs) were prepared as previously described [5]. NRCMs were transfected with either control siRNA (Sigma-Aldrich) or rat ERK2 siRNA (gene ID #116590; si genome SMART pool, Dharmacon) using Lipofectamine Plus reagent according to the manufacturer's instruction (Invitrogen) for 48 hours.

For detection of apoptosis *in vitro* NRCMs were plated onto laminin-coated coverslips and infected with control or ERK2 siRNA followed by treatment with 100µM H<sub>2</sub>O<sub>2</sub> for 8 hours. The cells were fixed with 4% PFA and permeabilized with 0.1% Triton X-100 and 0.1% sodium citrate. Apoptosis was detected with *in situ* Cell Death Detection Kit<sup>®</sup> (Roche). The cells were counterstained with DAPI to detect the nuclei and analysed by using ImageJ software.

#### **Immunocytochemistry**

To evaluate the hypertrophic response, NRCMs were plated onto laminin-coated coverslips and transfected with either control or ERK2 siRNA in 1% serum-medium for 24 hours, followed by further 48 hours treatment with PE (30mM, Sigma-Aldrich). Thereafter, NRCMs underwent triple immunostaining using anti-ANP antibody (1:500, Peninsula Laboratories, T4015) and anti- $\alpha$ -actinin antibody (1:100, Sigma-Aldrich, A7811) detected by secondary anti-rabbit antibody conjugated to Alexa Fluor 568 and anti-mouse antibody conjugated to FITC (Invitrogen), in addition, nuclei were stained with DAPI (Invitrogen). With ImageJ software the surface area of 150 cells per group was measured.

#### **Luciferase reporter assay**

To analyse whether dominant negative overexpression of ERK2 affects BNP promoter activity, NRCMs transfected with either control or ERK2 siRNA were infected with recombinant adenovirus encoding BNP-luciferase reporter gene (Ad-BNP-Luc) at MOI 25 for 24 hours followed by 24 hours treatment of PE (30µM). BNP luciferase activity was analysed using luciferase assay kit (Promega).

#### **Quantitative real-time PCR**

Total RNA from heart ventricle tissues were prepared using TRIzol (TRI reagent, Invitrogen) followed by synthesis of cDNA. Real time quantitative PCRs were performed by using SYBR Green PCR Master Mix (Applied Biosystems) according to the manufacturer's recommendations. Primers to identify ERK2, ANP, BNP, Coll $\alpha$ 2, Col3 $\alpha$ 1, Ctgf and GAPDH were obtained from Qiagen. Thermal cycling was performed in the 7500 Real Time PCR System (Applied Biosystems). The fold change was determined using the comparative threshold method ( $2^{-\Delta\Delta CT}$ ) [6]. The reporter signal was normalised to reactions performed using GAPDH.

#### **References**

- [1] Minamisawa S, Gu YS, Ross J, Chien KR, Chen J. A post-transcriptional compensatory pathway in heterozygous ventricular myosin light chain 2-deficient mice results in lack of gene dosage effect during normal cardiac growth or hypertrophy. *Journal Of Biological Chemistry*. 1999;274:10066.
- [2] Rockman HA, Ross RS, Harris AN, Knowlton KU, Steinhilber ME, Field LJ, et al. Segregation of atrial-specific and inducible expression of an atrial natriuretic factor transgene in an *in vivo* murine model of cardiac hypertrophy. *Proceedings of the National Academy of Sciences of the United States of America*. 1991;88:8277-81.
- [3] Gardin JM, Siri FM, Kitsis RN, Edwards JG, Leinwand LA. Echocardiographic assessment of left ventricular mass and systolic function in mice. *Circulation research*. 1995;76:907-14.

- [4] Liu W, Zi M, Naumann R, Ulm S, Jin J, Taglieri DM, et al. Pak1 as a novel therapeutic target for antihypertrophic treatment in the heart. *Circulation*. 2011;124:2702-15.
- [5] Armesilla AL, Williams JC, Buch MH, Pickard A, Emerson M, Cartwright EJ, et al. Novel functional interaction between the plasma membrane Ca<sup>2+</sup> pump 4b and the proapoptotic tumor suppressor Ras-associated factor 1 (RASSF1). *The Journal of biological chemistry*. 2004;279:31318-28.
- [6] Livak KJ, Schmittgen TD. Analysis of relative gene expression data using real-time quantitative PCR and the 2<sup>-</sup>(Delta Delta C(T)) Method. *Methods*. 2001;25:402-8.

Supplement Table I: Echocardiographic assessment of mice following swimming exercise.

|            | rest                |                     | swimming            |                     |
|------------|---------------------|---------------------|---------------------|---------------------|
|            | ERK2 <sup>f/f</sup> | ERK2 <sup>cko</sup> | ERK2 <sup>f/f</sup> | ERK2 <sup>cko</sup> |
| dPW (mm)   | 0.76±0.06           | 0.68±0.07           | 0.71±0.07           | 0.75±0.06           |
| dIVS (mm)  | 0.82±0.09           | 0.91±0.09           | 0.85±0.03           | 0.83±0.03           |
| LVEDD (mm) | 3.84±0.23           | 3.77±0.23           | 3.49±0.13           | 3.61±0.11           |
| LVESD (mm) | 2.67±0.27           | 2.64±0.22           | 2.24±0.13           | 2.41±0.08           |
| FS (%)     | 31.53±3.92          | 30.77±2.55          | 30.77±2.55          | 33.15±1.69          |

dPW, end-diastolic left ventricular posterior wall thickness; dIVS, end-diastolic interventricular wall thickness; LVEDD, diastolic left ventricular dimensions; LVESD, systolic left ventricular dimensions; FS%, fraction shortening. Data presented as mean±SEM (n= 6 to 8 per group).



**D**

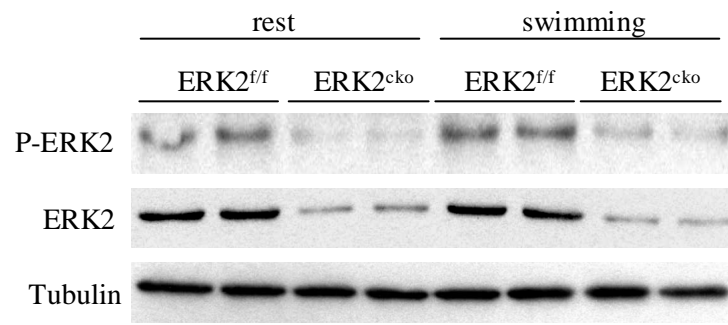

Supplement: mmc1.pdf [file mmc1.pdf]
